# Supplementary material
Source: PubMed Central journal article supplement (PMC2977881)
Supplement: supp_84_22_11729__1.pdf [file supp_84_22_11729__1.pdf]

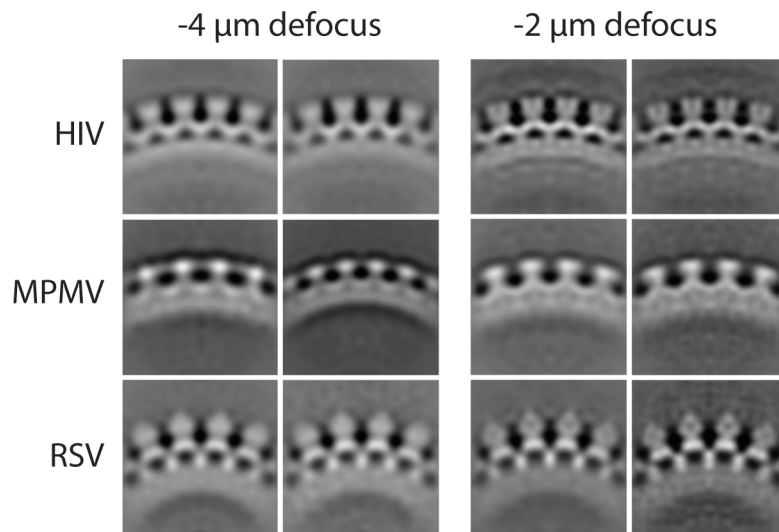

### **Supplementary figure 1**

Orthoslices through reconstructions produced using each half of the datasets independently at (A) -4 μm defocus and (B) -2 μm defocus. For further explanation see main text.
