# Supplementary material
Source: PubMed Central journal article supplement (PMC2977881)
Supplement: supp_84_22_11729__2.pdf [file supp_84_22_11729__2.pdf]

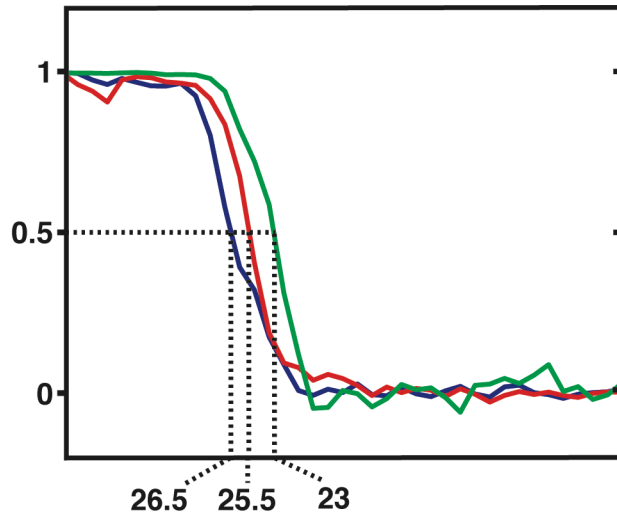

**Supplementary figure 2**

Fourier Shell Correlations between the CA-SP1 region from independent half reconstructions at approximately 2  $\mu\text{m}$  defocus for HIV (red), M-PMV (blue) and RSV (green). The NC-nucleic acid layer was excluded from the comparison since it is not symmetrically ordered.
